# Supplementary material for: The CXCR4 antagonist plerixafor enhances the effect of rituximab in diffuse large B-cell lymphoma cell lines
Source: PubMed Central journal article supplement (PMC4908729; doi:10.1186/s40364-016-0067-2), 2016-06-14

Rituximab

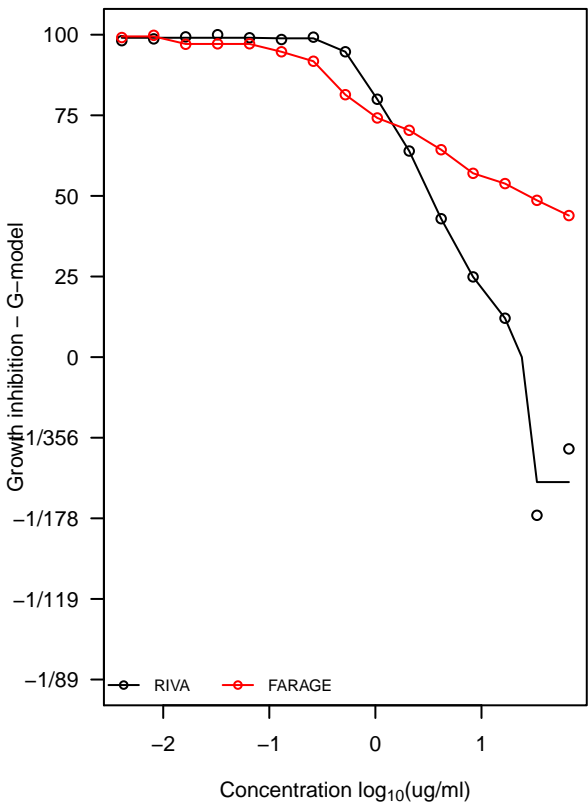Rituximab induced  $GI_{50}^G$ 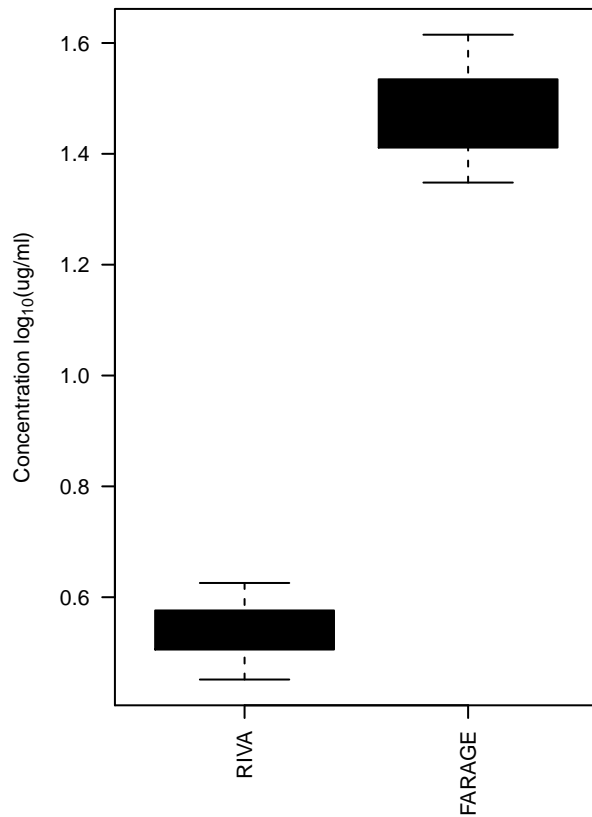Rituximab induced  $AUC_0^G$ 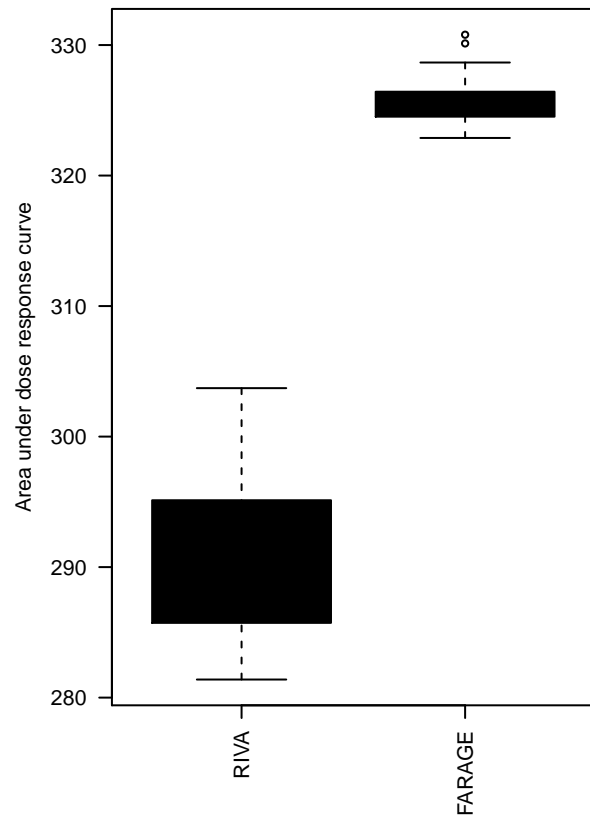

Supplement: 40364_2016_67_MOESM1_ESM.pdf [file 40364_2016_67_MOESM1_ESM.pdf]
